# Supplementary material
Source: publisher figshare collection journal article supplement (https://karger.figshare.com/articles/dataset/_/5128930)

Supplementary Figure 1

Analysis of *DEK* (6p23) breakpoint

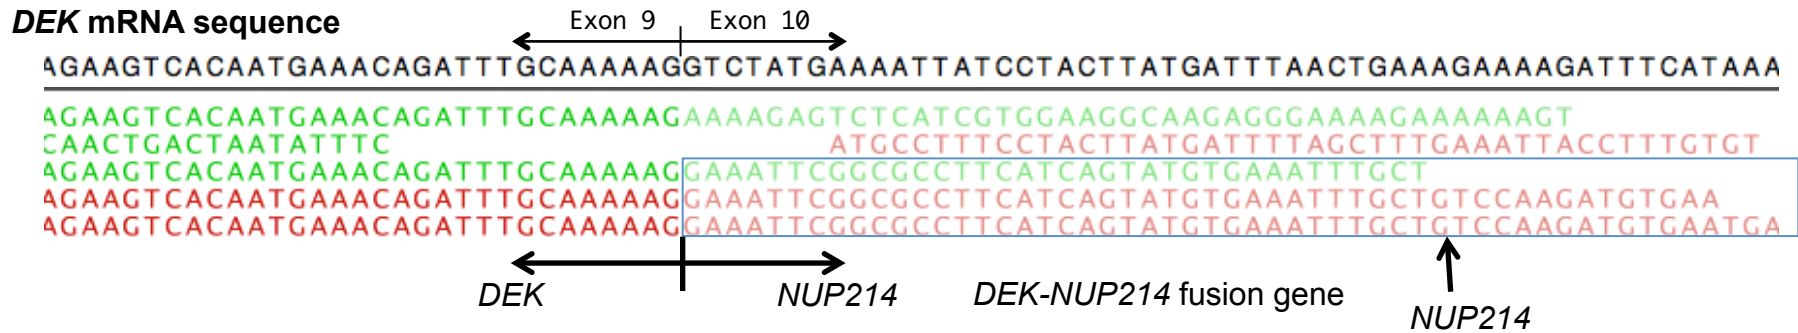

Analysis of *NUP214* (9q34) breakpoint

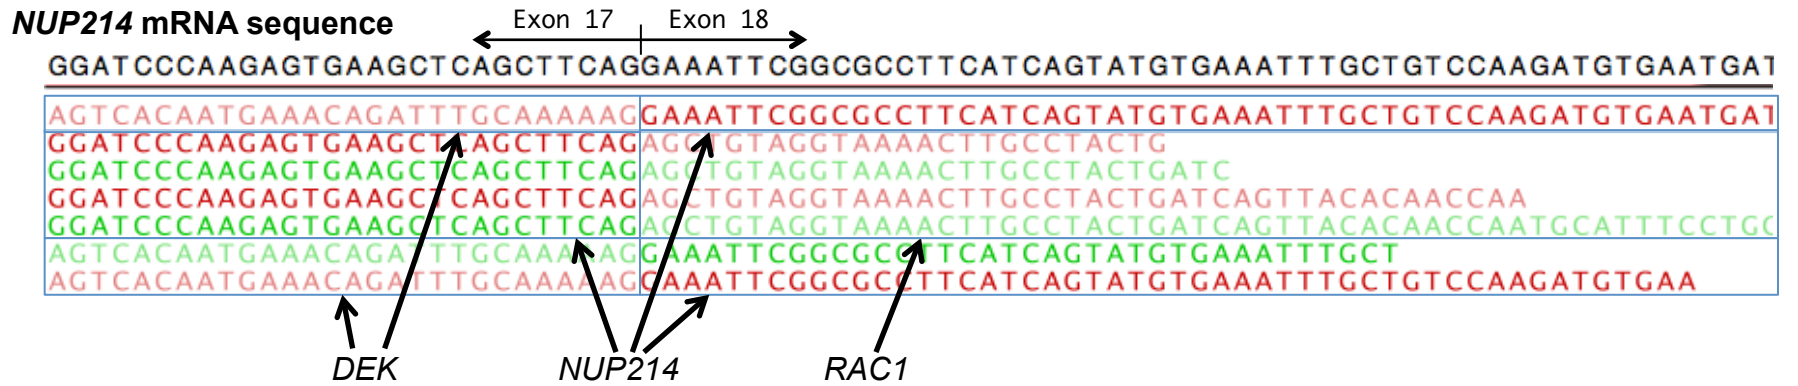

Analysis of *RAC1* (7p22) breakpoint

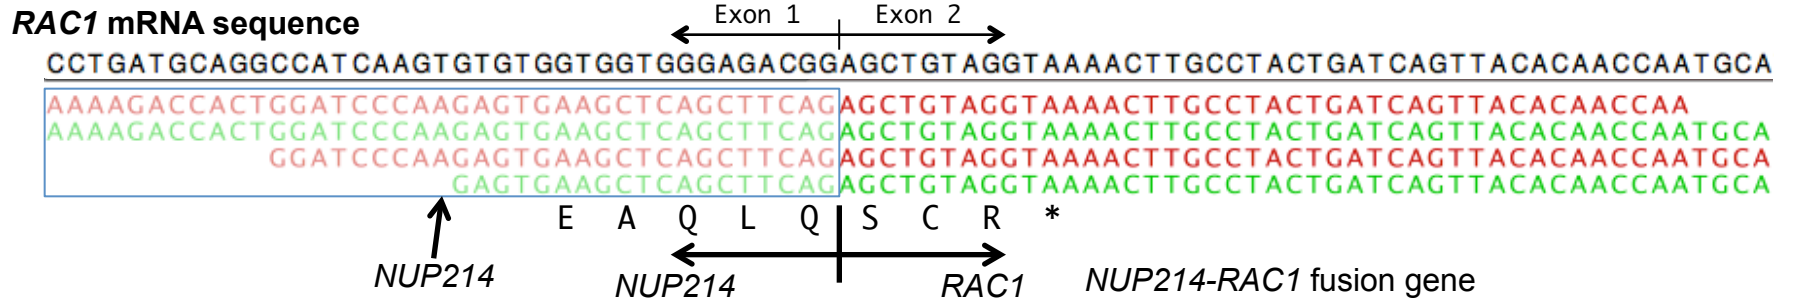

Supplementary Figure 2

Analysis of *RAC1* breakpoint

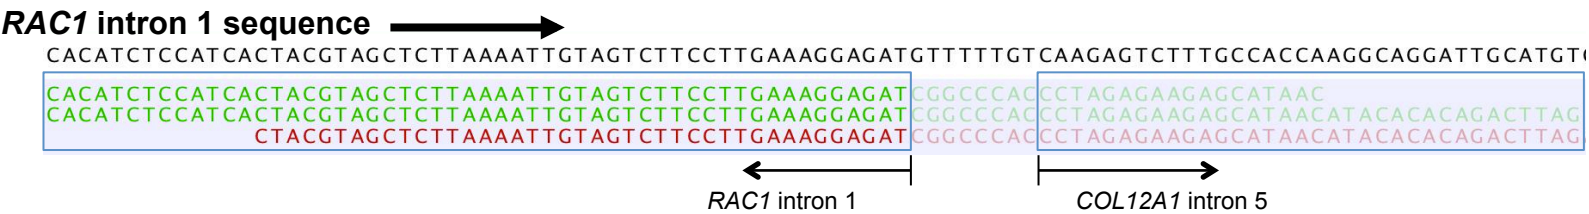

Analysis of *COL12A1* breakpoint

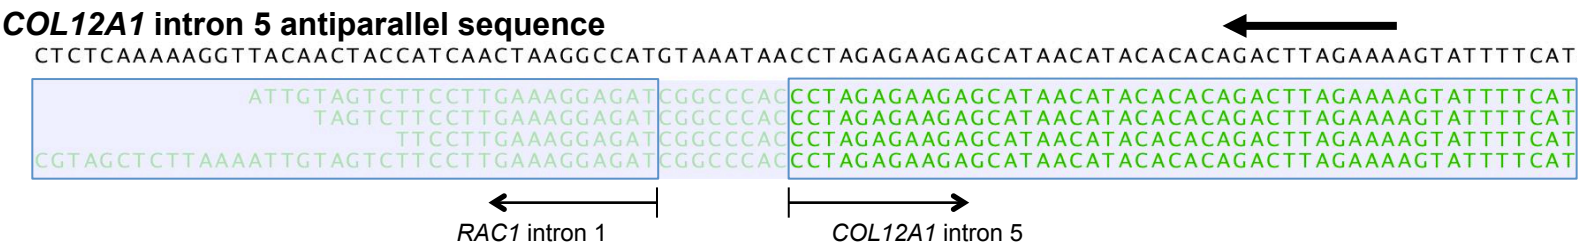

Supplement: Supplementary file 1 [file 1]
